# Supplementary material
Source: PubMed Central journal article supplement (PMC7896874)
Supplement: 10875_2021_996_MOESM1_ESM.pdf [file 10875_2021_996_MOESM1_ESM.pdf]

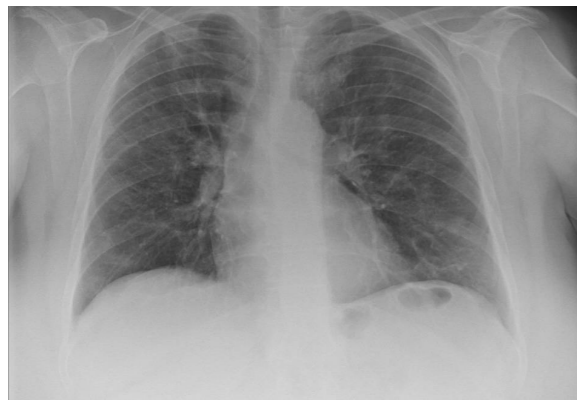

Day 0

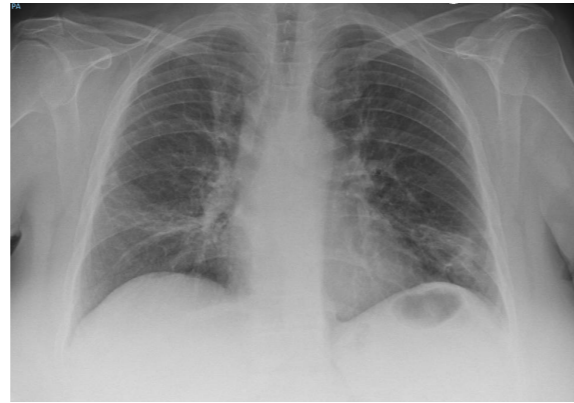

Day 6

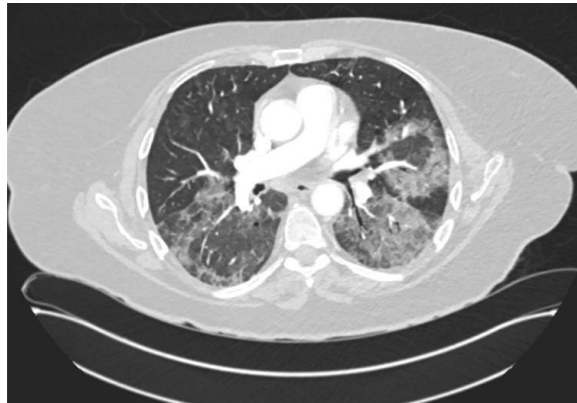

Day 52

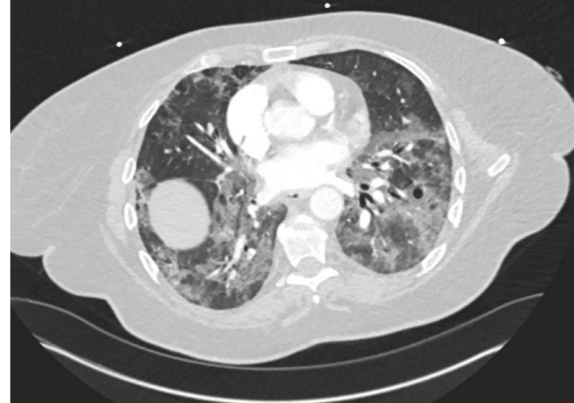

Day 80

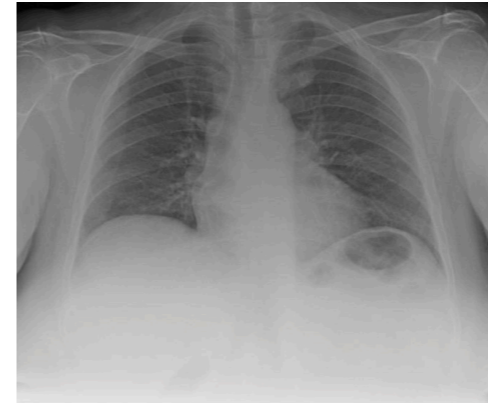

Day 154

**Supplementary Figure 1:** Serial chest radiographs demonstrating progressive bilateral lower lobe changes (upper panels), further characterised as progressive ground glass and cystic changes using serial cross-sectional imaging (lower panels). Resolution of radiological changes seen on plain films was observed by day 154.
